# Supplementary material for: Efficient CRISPR‐based genome editing using tandem guide RNAs and editable surrogate reporters
Source: PubMed Central journal article supplement (PMC6026697; doi:10.1002/2211-5463.12437), 2018-06-13
Supplement: FEB4-8-1167-s001.pdf [file FEB4-8-1167-s001.pdf]

Supplementary Table 1 List of sgRNAs and target site primers used in the study

| Target gene       | Guide               | Sequence                          |
|-------------------|---------------------|-----------------------------------|
| Human <i>DAZL</i> | dazl.sgRNA.1-F      | CACCGCCCATGTAAGTACTAGATAAGCC      |
|                   | dazl.sgRNA.1-R      | AAACGGCTTATCTAGTTACATGGGC         |
|                   | dazl.sgRNA.2-F      | CACCGTTTTGAATATTAAGCTAAA          |
|                   | dazl.sgRNA.2-R      | AAACTTTAGCTTAATATTCAAAAAC         |
|                   | dazl.sgRNA.3-F      | CACCGCATCACTTTAGAAGAAGTC          |
|                   | dazl.sgRNA.3-R      | AAACGACTTCTTCTAAAGTGATGC          |
|                   | dazl.sgRNA.1-AGG-F  | CACCGCCCATGTAAGTACTAGATAAGCCAGG   |
|                   | dazl.sgRNA.1-AGG-R  | AAACCCTGGCTTATCTAGTTACATGGGC      |
|                   | dazl.sgRNA.2-AGG-F  | CACCGTTTTGAATATTAAGCTAAAAGG       |
|                   | dazl.sgRNA.2-AGG-R  | AAACCCTTTTAGCTTAATATTCAAAAAC      |
|                   | dazl.sgRNA.3-AGG-F  | CACCGCATCACTTTAGAAGAAGTCGGG       |
|                   | dazl.sgRNA.3-AGG-R  | AAACCCCGACTTCTTCTAAAGTGATGC       |
| Mouse <i>PLZF</i> | plzf.sgRNA.1-F      | CACCGCCTGTGTTATGTGTGAAGGG         |
|                   | plzf.sgRNA.1-R      | AAACCCCTTCACACATAACACAGGC         |
|                   | plzf.sgRNA.2-F      | CACCGCCCAACACATGGTAGAGCAG         |
|                   | plzf.sgRNA.2-R      | AAACCTGCTCTACCATGTGTTGGGC         |
|                   | plzf.sgRNA.3-F      | CACCGCCCCCTTCACACATAACAC          |
|                   | plzf.sgRNA.3-R      | AAACGTGTTATGTGTGAAGGGGGGC         |
|                   | plzf.sgRNA-NGG-F    | AACGGATCCTCCATGCAGAAACACATGA      |
|                   | plzf.sgRNA-NGG-R    | ATCAAGCTTCCACTTTGTCTGGTTCTAG      |
| Mouse <i>ACR</i>  | acrosin.sgRNA.1-F   | CACCGCATCTCTCTTTTCTCAGGAA         |
|                   | acrosin.sgRNA.1-R   | AAACTTCCTGAGAAAAGAGAGATGC         |
|                   | acrosin.sgRNA.2-F   | CACCGCTTTTCTCAGGAATGGAGGA         |
|                   | acrosin.sgRNA.2-R   | AAACTCCTCCATTCCTGAGAAAAGC         |
|                   | acrosin.sgRNA.3-F   | CACCGCTCTCTTTTCTCAGGAATGG         |
|                   | acrosin.sgRNA.3-R   | AAACCCATTCTGAGAAAAGAGAGC          |
|                   | acrosin.sgRNA-NGG-F | AACGGATCCAGTACAGTGGACCAAGGAAC TAC |
|                   | acrosin.sgRNA-NGG-R | ATCAAGCTTGATGGAGGAAGATTTGGGTTGAG  |
